# Supplementary material for: Thymocytes may persist and differentiate without any input from bone marrow progenitors
Source: PubMed Central journal article supplement — J Exp Med. 2012 Jul 30;209(8):1401–8. doi: 10.1084/jem.20120845 (PMC3420331; doi:10.1084/jem.20120845), 2012-07-30
Supplement: supp_jem.20120845_JEM_20120845_sm.pdf [file supp_jem.20120845_JEM_20120845_sm.pdf]

SUPPLEMENTAL MATERIAL

Peaudecarf et al., <http://www.jem.org/cgi/content/full/jem.20120845/DC1>

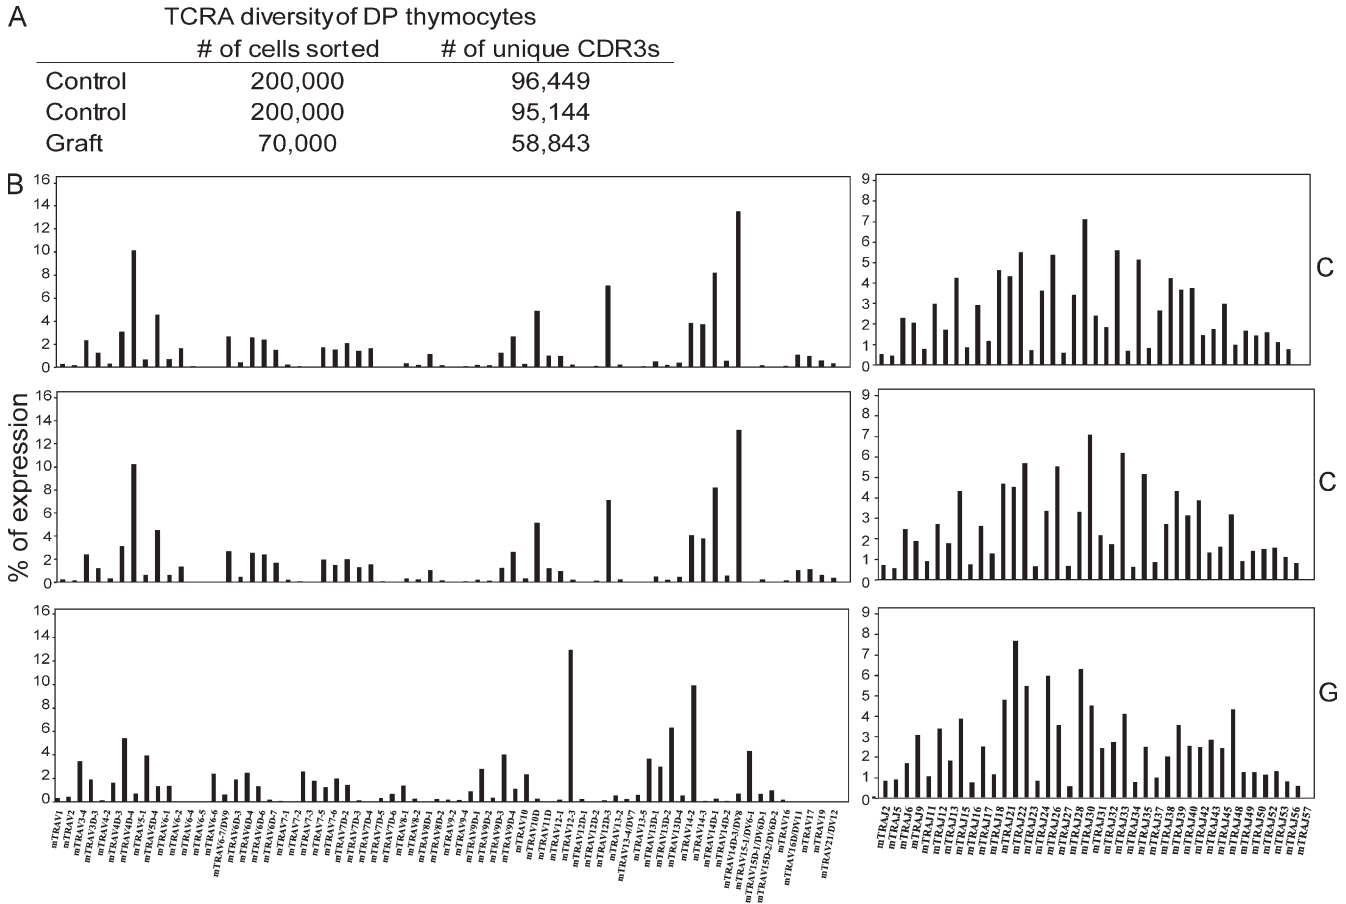

**Figure S1. The CD4<sup>+</sup>CD8 $\alpha$  $\beta$ <sup>+</sup> (DP) populations persisting in the grafts.** 6–8-wk-old CD45.2<sup>+</sup> B6 Rag2 $\gamma$ <sub>c</sub><sup>-</sup> mice were grafted with a single thymus lobe from CD45.1<sup>+</sup> B6 WT neonatal mice. 2 mo later, DP cells from the graft or from age-matched controls were sorted and the TCRA repertoires were analyzed. (A) Numbers of cells sorted and of unique CDR3 regions identified. (B) TCRAV and TCRAJ usage in two controls (C, top graphs) and one transplanted thymus (G, bottom graph) from the four transplanted mice studied.

**A** TCR diversity of CD8 T cells in the spleen

|            | # of cells sorted | # of unique CDR3s |         |
|------------|-------------------|-------------------|---------|
|            |                   | TCRB              | TCRA    |
| Control    | 200,000           | 113,032           | 140,070 |
| Control    | 200,000           | 106,590           | 136,362 |
| Graft (4w) | 200,000           | 104,284           | 142,064 |
| Graft (4w) | 200,000           | 129,998           | 124,641 |
| Graft (6w) | 200,000           | 109,090           | 167,908 |
| Graft (8w) | 200,000           | ND                | 185,346 |

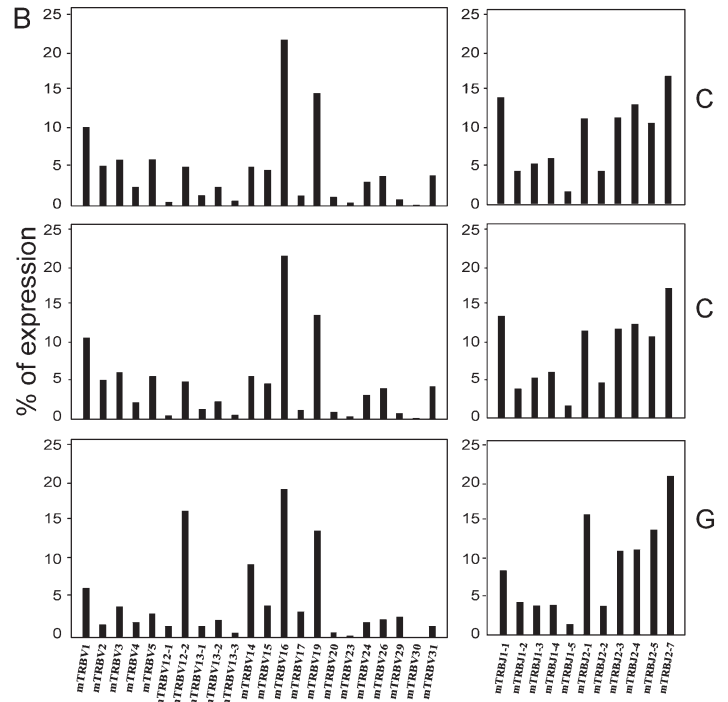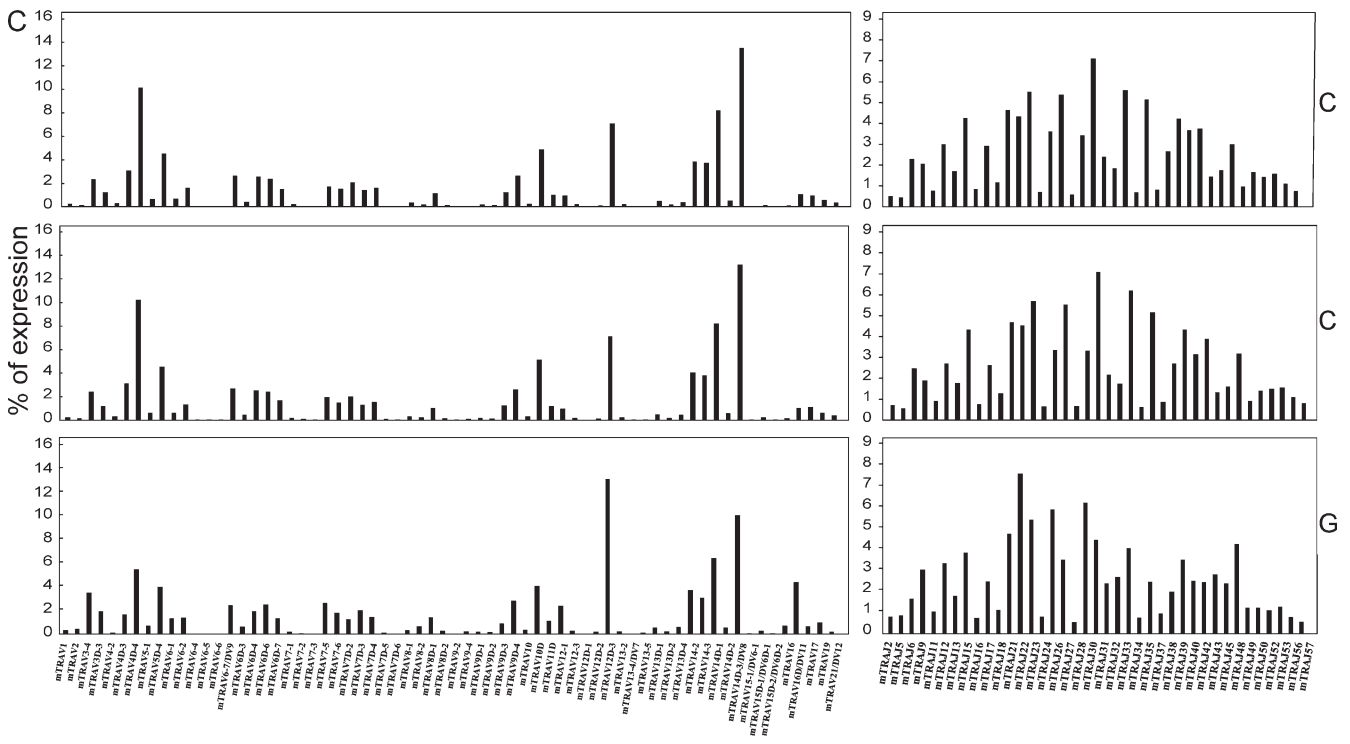

**Figure S2. The repertoire of the peripheral T cell pools 1 mo after grafting.** 6–8-wk-old CD45.2<sup>+</sup> B6 Rag2 $\gamma_c^-$  mice were grafted with a single thymus lobe from CD45.1<sup>+</sup> B6 WT neonatal mice. At different time points after surgery, 2 × 10<sup>4</sup> CD8 T cells were sorted from their spleen or from the spleen of age-matched controls and TCRB and TCRA repertoires were analyzed. (A) Numbers of unique CDR3 regions identified in the spleen. (B) TCRVB and TCRBJ usage (C) TCRA and TCRJA usage in two WT mice (C, top graphs) and one transplanted mouse (G, bottom graph) at 1 mo after grafting. 4 mice were studied at different time points with the equivalent results.

**Table S1.** Primer sequences used for single-cell genetic profiling

| Genes         | Primer sequences                                                             |
|---------------|------------------------------------------------------------------------------|
| <i>Bcl11b</i> | A: GGCGATGCCAGAATAGATGC<br>B: TTGTCCAGGACCTTGTGTA<br>C: TTGTCCCAGAGGGAATCAT  |
| <i>Gata3</i>  | A: TCGGCCATTCTGATGGAA<br>B: TGGATGGACGTCTGGAGAA<br>C: ATCGATGGTCAAGGCAACCA   |
| <i>Notch1</i> | A: GCTACGAATGCTGTGAA<br>B: CATACTAGCCACTGGTCT<br>C: CAACGAGTGCAACAGTAACC     |
| <i>Rag1</i>   | A: CAACCAAGCTGCAGACATTC<br>B: CTAAGGAGACTGTTCTAGG<br>C: GCAGACATTCTAGCACTCTG |

All primer sequences are in 5' → 3' direction. B primers are anti-sense, and were used for gene-specific reverse transcription. This was followed by a first RT-PCR associating primers A and B. A second, seminested PCR was performed by adding primers B and C. Primers for the house keeping gene were as described (Peixoto et al., 2004).

#### REFERENCE

Peixoto, A., M. Monteiro, B. Rocha, and H. Veiga-Fernandes. 2004. Quantification of multiple gene expression in individual cells. *Genome Res.* 14:1938–1947. <http://dx.doi.org/10.1101/gr.2890204>
